# Supplementary material
Source: Royal Society of Chemistry journal article supplement (doi:10.1039/d6ce00268d)
Supplement: d6ce00268d1.pdf [file d6ce00268d1.pdf]

Electronic Supplementary Material (ESI) for *CrystEngComm*.

## Electronic supplementary information (ESI)

### **Sensitized near-infrared emission of [Ln(hfac)<sub>4</sub>]<sup>-</sup> [Ln(III) = Nd, Yb, Er] via ruthenium counterions of 2,3,5,6-tetrakis-(2-pyridyl)pyrazine**

Yan Li\*, Yue-Yun Zou, Xin-Wen Hou, Yu Wu, Le-Yan Sun, Kai Wang

Guangxi Key Laboratory of Electrochemical and Magneto-chemical Functional Materials, College of Chemistry and Bioengineering, Guilin University of Technology, Guilin 541004, P. R. China.

\*Corresponding author. Tel: +86 13097735492 (Y. Li).

*E-mail address:* ly741110@163.com (Y. Li).

## Table of Content

1. **Table S1** Crystallographic data and structure refinement parameters for complexes **1-3**.
2. **Table S2** Selected bond lengths [Å] and bond angles [°] for complex **1**.
3. **Table S3** Selected bond lengths [Å] and bond angles [°] for complex **2** and **3**.
4. **Table S4** Ln···Ru distances in complexes **1-3**.
5. **Table S5** Figures of merits for different geometries of the coordination sphere of Nd(III) centre assuming for **1** calculated with SHAPE software.
6. **Table S6** Figures of merits for different geometries of the coordination spheres of Yb(III) and Er(III) centres assuming for **2** and **3** calculated with SHAPE software.
7. **Fig 1S** Perspective views of the [Ru(tppz)<sub>2</sub>]<sup>2+</sup> cations in (a) 1-Nd and (b) 2-Yb with the pyrazine and pyridyl rings numbering.
8. **Table S7** The dihedral angles of the pyridyl rings (A–D) with respect to the pyrazine ring (E) in the [Ru(tppz)<sub>2</sub>]<sup>2+</sup> cation of complex **1**.
9. **Table S8** The dihedral angles of the pyridyl rings (A–D) with respect to the pyrazine ring (E) in the [Ru(tppz)<sub>2</sub>]<sup>2+</sup> cation of complex **2**.
10. **Table S9** π-π stacking interactions are observed between the aromatic rings in complex **1**.
11. **Table S10** π-π stacking interactions are observed between the aromatic rings in complex **2**.
12. **Table S11** IR data for [Ru(tppz)<sub>2</sub>](PF<sub>6</sub>) and complexes **1-3**.
13. **Fig 2S** IR spectrum of [Ru(tppz)<sub>2</sub>](PF<sub>6</sub>) and complexes **1-3**.
14. **Fig S3** TGA (black) and DTG (red) curves for complexes **1-3**.
15. **Table S12** Relative contributions of various intermolecular interactions to the Hirshfeld surfaces for complexes **1-3**.
16. **Fig S4** the solid-state fluorescence decay curve of <sup>4</sup>F<sub>3/2</sub> → <sup>4</sup>I<sub>11/2</sub> transition of 1-Nd at 1062 nm.

1. **Table S1** Crystallographic data and structure refinement parameters for complexes **1-3**.

| Complex                                                | 1-Nd                                                                                               | 2-Yb                                                                                               | 3-Er                                                                                               |
|--------------------------------------------------------|----------------------------------------------------------------------------------------------------|----------------------------------------------------------------------------------------------------|----------------------------------------------------------------------------------------------------|
| Chemical formula                                       | C <sub>88</sub> H <sub>51</sub> F <sub>48</sub> N <sub>12</sub> O <sub>19</sub> Nd <sub>2</sub> Ru | C <sub>88</sub> H <sub>44</sub> F <sub>48</sub> N <sub>12</sub> O <sub>16</sub> Yb <sub>2</sub> Ru | C <sub>88</sub> H <sub>44</sub> F <sub>48</sub> N <sub>12</sub> O <sub>16</sub> Er <sub>2</sub> Ru |
| Formula weight                                         | 2881.95                                                                                            | 2884.50                                                                                            | 2868.91                                                                                            |
| Crystal system                                         | monoclinic                                                                                         | monoclinic                                                                                         | monoclinic                                                                                         |
| <i>T</i> (K)                                           | 150(2)                                                                                             | 150(2)                                                                                             | 150(2)                                                                                             |
| Space group                                            | <i>P</i> 2 <sub>1</sub> / <i>n</i>                                                                 | <i>C</i> 2/ <i>c</i>                                                                               | <i>C</i> 2/ <i>c</i>                                                                               |
| <i>a</i> (Å)                                           | 23.1251(5)                                                                                         | 28.2674(9)                                                                                         | 28.2196(7)                                                                                         |
| <i>b</i> (Å)                                           | 18.7945(4)                                                                                         | 25.3749(10)                                                                                        | 25.4700(8)                                                                                         |
| <i>c</i> (Å)                                           | 25.7849(6)                                                                                         | 15.9496(7)                                                                                         | 15.9589(5)                                                                                         |
| <i>α</i> (°)                                           | 90                                                                                                 | 90                                                                                                 | 90                                                                                                 |
| <i>β</i> (°)                                           | 94.6870(10)                                                                                        | 100.4430(10)                                                                                       | 100.5510(10)                                                                                       |
| <i>γ</i> (°)                                           | 90                                                                                                 | 90                                                                                                 | 90                                                                                                 |
| <i>V</i> (Å <sup>3</sup> )                             | 11169.3(4)                                                                                         | 11250.9(8)                                                                                         | 11276.6(6)                                                                                         |
| <i>Z</i>                                               | 4                                                                                                  | 4                                                                                                  | 4                                                                                                  |
| $\rho_{\text{calc}}$ / g·cm <sup>-3</sup>              | 1.714                                                                                              | 1.703                                                                                              | 1.690                                                                                              |
| $\mu$ (mm <sup>-1</sup> )                              | 9.412                                                                                              | 1.924                                                                                              | 1.749                                                                                              |
| <i>F</i> (000)                                         | 5644                                                                                               | 5600                                                                                               | 5568                                                                                               |
| $\theta$ (°)                                           | 2.468-66.586                                                                                       | 2.065-25.000                                                                                       | 2.171-26.392                                                                                       |
| Limiting indices                                       | -27 ≤ <i>h</i> ≤ 26<br>-22 ≤ <i>k</i> ≤ 22<br>-21 ≤ <i>l</i> ≤ 30                                  | -33 ≤ <i>h</i> ≤ 33<br>-30 ≤ <i>k</i> ≤ 30<br>-18 ≤ <i>l</i> ≤ 18                                  | -35 ≤ <i>h</i> ≤ 35<br>-31 ≤ <i>k</i> ≤ 31<br>-19 ≤ <i>l</i> ≤ 19                                  |
| Reflections collected                                  | 64827<br>[ <i>R</i> <sub>(int)</sub> = 0.0665]                                                     | 131238<br>[ <i>R</i> <sub>(int)</sub> = 0.0567]                                                    | 142342<br>[ <i>R</i> <sub>(int)</sub> = 0.0780]                                                    |
| Data/restraints/parameters                             | 19529/502/1531                                                                                     | 9917/1/755                                                                                         | 11515/8/755                                                                                        |
| Goodness-of-fit on <i>F</i> <sup>2</sup>               | 1.036                                                                                              | 1.058                                                                                              | 1.093                                                                                              |
| Final <i>R</i> indexes<br>[ <i>I</i> ≥ 2σ( <i>I</i> )] | <i>R</i> <sub>1</sub> = 0.0717<br><i>wR</i> <sub>2</sub> = 0.1949                                  | <i>R</i> <sub>1</sub> = 0.0356<br><i>wR</i> <sub>2</sub> = 0.0972                                  | <i>R</i> <sub>1</sub> = 0.0482<br><i>wR</i> <sub>2</sub> = 0.1200                                  |
| Final <i>R</i> indexes<br>[all data]                   | <i>R</i> <sub>1</sub> = 0.0788<br><i>wR</i> <sub>2</sub> = 0.2062                                  | <i>R</i> <sub>1</sub> = 0.0411<br><i>wR</i> <sub>2</sub> = 0.1004                                  | <i>R</i> <sub>1</sub> = 0.0554<br><i>wR</i> <sub>2</sub> = 0.1248                                  |
| Largest diff. peak/hole<br>[eÅ <sup>-3</sup> ]         | 1.53 / -0.79                                                                                       | 1.33 / -0.61                                                                                       | 1.45 / -1.33                                                                                       |
| CCDC Deposition No.                                    | 2168475                                                                                            | 2168476                                                                                            | 2168477                                                                                            |

2. **Table S2** Selected bond lengths [Å] and bond angles [°] for complex **1**.

| Complex          |            | 1-Nd        |            |
|------------------|------------|-------------|------------|
| Bond lengths [Å] |            |             |            |
| Nd1—O1           | 2.544 (4)  | Nd2—O13     | 2.470 (5)  |
| Nd1—O2           | 2.486 (4)  | Nd2—O14     | 2.541 (5)  |
| Nd1—O3           | 2.455 (5)  | Nd2—O15     | 2.452 (5)  |
| Nd1—O4           | 2.438 (4)  | Nd2—O16     | 2.440 (4)  |
| Nd1—O5           | 2.502 (5)  | Nd2—O17     | 2.543 (5)  |
| Nd1—O6           | 2.457 (5)  | Nd2—O18     | 2.477 (5)  |
| Nd1—O7           | 2.445 (4)  | Ru1-N1      | 2.060(5)   |
| Nd1—O8           | 2.480 (5)  | Ru1-N2      | 1.971(4)   |
| Nd1—O9           | 2.481 (4)  | Ru1-N3      | 2.069(4)   |
| Nd2—O10          | 2.482 (5)  | Ru1-N6      | 2.069(5)   |
| Nd2—O11          | 2.469 (6)  | Ru1-N5      | 1.981(4)   |
| Nd2—O12          | 2.440 (4)  | Ru1-N4      | 2.071(5)   |
| Bond angles [°]  |            |             |            |
| O2-Nd1-O1        | 70.35(14)  | O12-Nd2-O11 | 69.19(17)  |
| O2-Nd1-O5        | 125.30(16) | O12-Nd2-O13 | 77.44(16)  |
| O3-Nd1-O1        | 136.83(15) | O12-Nd2-O14 | 144.81(15) |
| O3-Nd1-O2        | 70.45(15)  | O12-Nd2-O15 | 135.21(16) |
| O3-Nd1-O5        | 67.84(19)  | O12-Nd2-O17 | 67.17(15)  |
| O3-Nd1-O6        | 143.65(17) | O12-Nd2-O18 | 75.90(14)  |
| O3-Nd1-O8        | 69.40(16)  | O13-Nd2-O10 | 109.30(19) |
| O3-Nd1-O9        | 137.84(16) | O13-Nd2-O14 | 68.62(17)  |
| O4-Nd1-O1        | 69.18(15)  | O13-Nd2-O17 | 125.14(17) |
| O4-Nd1-O2        | 71.30(15)  | O13-Nd2-O18 | 140.67(17) |
| O4-Nd1-O3        | 81.75(16)  | O14-Nd2-O17 | 126.65(17) |
| O4-Nd1-O5        | 69.15(16)  | O15-Nd2-O10 | 76.49(18)  |
| O4-Nd1-O6        | 88.45(16)  | O15-Nd2-O11 | 144.86(17) |
| O4-Nd1-O7        | 138.93(15) | O15-Nd2-O13 | 129.45(16) |
| O4-Nd1-O8        | 139.75(16) | O15-Nd2-O14 | 67.46(17)  |
| O4-Nd1-O9        | 132.97(16) | O15-Nd2-O17 | 68.10(16)  |
| O5-Nd1-O1        | 124.91(17) | O15-Nd2-O18 | 89.63(15)  |
| O6-Nd1-O1        | 68.54(15)  | O16-Nd2-O10 | 136.49(17) |
| O6-Nd1-O2        | 138.41(15) | O16-Nd2-O11 | 141.24(17) |
| O6-Nd1-O5        | 75.94(18)  | O16-Nd2-O12 | 89.30(15)  |
| O6-Nd1-O8        | 131.23(16) | O16-Nd2-O13 | 70.94(18)  |
| O6-Nd1-O9        | 71.33(16)  | O16-Nd2-O14 | 71.40(16)  |
| O7-Nd1-O1        | 128.58(15) | O16-Nd2-O15 | 72.38(15)  |
| O7-Nd1-O2        | 145.41(15) | O16-Nd2-O17 | 68.22(16)  |
| O7-Nd1-O3        | 94.31(15)  | O16-Nd2-O18 | 136.38(17) |

|             |            |             |            |
|-------------|------------|-------------|------------|
| O7-Nd1-O5   | 71.55(16)  | O18-Nd2-O10 | 71.64(17)  |
| O7-Nd1-O6   | 70.76(16)  | O18-Nd2-O14 | 137.91(15) |
| O7-Nd1-O8   | 72.69(16)  | O18-Nd2-O17 | 68.21(16)  |
| O7-Nd1-O9   | 74.23(16)  | N1-Ru1-N3   | 157.98(18) |
| O8-Nd1-O1   | 114.48(14) | N1-Ru1-N4   | 89.07(17)  |
| O8-Nd1-O2   | 72.88(15)  | N1-Ru1-N6   | 95.85(17)  |
| O8-Nd1-O5   | 120.61(18) | N2-Ru1-N1   | 79.38(17)  |
| O8-Nd1-O9   | 68.45(15)  | N2-Ru1-N3   | 78.60(18)  |
| O9-Nd1-O1   | 63.96(15)  | N2-Ru1-N4   | 101.55(18) |
| O9-Nd1-O2   | 96.05(15)  | N2-Ru1-N5   | 176.48(18) |
| O9-Nd1-O5   | 138.64(17) | N2-Ru1-N6   | 100.55(17) |
| O10-Nd2-O14 | 68.95(17)  | N3-Ru1-N4   | 95.43(18)  |
| O10-Nd2-O17 | 125.51(18) | N5-Ru1-N1   | 97.15(17)  |
| O11-Nd2-O10 | 69.85(19)  | N5-Ru1-N3   | 104.86(18) |
| O11-Nd2-O13 | 73.04(19)  | N5-Ru1-N4   | 78.91(18)  |
| O11-Nd2-O14 | 107.91(19) | N5-Ru1-N6   | 79.08(18)  |
| O11-Nd2-O17 | 125.43(18) | N6-Ru1-N3   | 88.06(18)  |
| O11-Nd2-O18 | 70.73(18)  | N6-Ru1-N4   | 157.88(18) |
| O12-Nd2-O10 | 134.01(17) |             |            |

3. **Table S3** Selected bond lengths [ $\text{\AA}$ ] and bond angles [ $^\circ$ ] for complex **2** and **3**.

| Complex                       | <b>2</b> -Yb | <b>3</b> -Er |
|-------------------------------|--------------|--------------|
| Bond lengths [ $\text{\AA}$ ] |              |              |
| Ln1-O1                        | 2.313(3)     | 2.333(4)     |
| Ln1-O2                        | 2.261(3)     | 2.281(4)     |
| Ln1-O3                        | 2.269(3)     | 2.306(3)     |
| Ln1-O4                        | 2.345(3)     | 2.363(4)     |
| Ln1-O5                        | 2.327(3)     | 2.346(3)     |
| Ln1-O6                        | 2.282(3)     | 2.301(3)     |
| Ln1-O7                        | 2.284(3)     | 2.289(3)     |
| Ln1-O8                        | 2.344(3)     | 2.361(3)     |
| Ru1-N3                        | 1.967(4)     | 1.968(5)     |
| Ru1-N4                        | 2.071(3)     | 2.074(3)     |
| Ru1-N5                        | 2.062(3)     | 2.061(3)     |
| Ru1-N6                        | 1.972(4)     | 1.981(5)     |
| Ru1-N4 <sup>1</sup>           | 2.071(3)     | 2.074(3)     |
| Ru1-N5 <sup>1</sup>           | 2.062(3)     | 2.061(3)     |
| Bond angles [ $^\circ$ ]      |              |              |
| O1-Ln1-O4                     | 132.16(11)   | 75.92(13)    |
| O1-Ln1-O5                     | 125.91(10)   | 125.72(12)   |
| O1-Ln1-O8                     | 74.96(11)    | 131.04(13)   |
| O2-Ln1-O1                     | 75.26(11)    | 74.87(13)    |
| O2-Ln1-O3                     | 90.78(11)    | 143.30(13)   |
| O2-Ln1-O4                     | 70.93(11)    | 74.77(14)    |

|                                      |            |            |
|--------------------------------------|------------|------------|
| O2-Ln1-O5                            | 144.72(11) | 145.65(13) |
| O2-Ln1-O6                            | 105.04(11) | 105.10(13) |
| O2-Ln1-O7                            | 144.14(11) | 91.63(13)  |
| O2-Ln1-O8                            | 75.18(11)  | 71.21(13)  |
| O3-Ln1-O1                            | 72.20(11)  | 79.38(13)  |
| O3-Ln1-O4                            | 75.41(10)  | 73.90(12)  |
| O3-Ln1-O5                            | 73.27(10)  | 71.05(12)  |
| O3-Ln1-O6                            | 142.04(10) | 82.35(12)  |
| O3-Ln1-O7                            | 104.60(10) | 104.84(12) |
| O3-Ln1-O8                            | 146.63(11) | 144.43(13) |
| O5-Ln1-O4                            | 74.61(10)  | 132.83(12) |
| O5-Ln1-O8                            | 133.54(11) | 75.09(12)  |
| O6-Ln1-O1                            | 144.82(11) | 145.80(13) |
| O6-Ln1-O4                            | 77.59(10)  | 71.32(12)  |
| O6-Ln1-O5                            | 74.18(10)  | 73.60(11)  |
| O6-Ln1-O7                            | 82.57(10)  | 141.22(12) |
| O6-Ln1-O8                            | 71.34(10)  | 77.96(12)  |
| O7-Ln1-O1                            | 78.92(11)  | 71.99(12)  |
| O7-Ln1-O4                            | 143.94(11) | 147.46(12) |
| O7-Ln1-O5                            | 71.13(10)  | 73.10(12)  |
| O7-Ln1-O8                            | 74.36(11)  | 74.76(11)  |
| O8-Ln1-O4                            | 125.31(10) | 125.44(12) |
| N3-Ru1-N4                            | 79.44(9)   | 79.32(10)  |
| N3-Ru1-N5                            | 100.84(9)  | 100.78(10) |
| N3-Ru1-N6                            | 180.0      | 180.0      |
| N3-Ru1-N4 <sup>1</sup>               | 79.44(9)   | 79.32(10)  |
| N3-Ru1-N5 <sup>1</sup>               | 100.83(9)  | 100.78(10) |
| N4-Ru1-N4 <sup>1</sup>               | 158.88(18) | 158.6(2)   |
| N5-Ru1-N4                            | 96.79(12)  | 86.83(13)  |
| N5-Ru1-N4 <sup>1</sup>               | 87.17(12)  | 97.16(13)  |
| N5-Ru1-N5 <sup>1</sup>               | 158.33(18) | 158.4(2)   |
| N6-Ru1-N4                            | 100.56(9)  | 100.68(10) |
| N6-Ru1-N5                            | 79.16(9)   | 79.22(10)  |
| N6-Ru1-N4 <sup>1</sup>               | 100.56(9)  | 100.68(10) |
| N6-Ru1-N5 <sup>1</sup>               | 79.17(9)   | 79.22(10)  |
| N5 <sup>1</sup> -Ru1-N4              | 87.18(12)  | 97.16(13)  |
| N5 <sup>1</sup> -Ru1-N4 <sup>1</sup> | 96.79(12)  | 86.83(13)  |

4. **Table S4** Ln<sup>III</sup>···Ru distances in complexes **1-3**.

| Complex                                                                                       | Ln <sup>III</sup> ···Ru distance | Value [Å] |
|-----------------------------------------------------------------------------------------------|----------------------------------|-----------|
| [Ru(tppz) <sub>2</sub> ][Nd(hfac) <sub>4</sub> (H <sub>2</sub> O) <sub>2</sub> ] ( <b>1</b> ) | Nd1···Ru1                        | 8.669     |
| [Ru(tppz) <sub>2</sub> ][Yb(hfac) <sub>4</sub> ] <sub>2</sub> ( <b>2</b> )                    | Yb1···Ru1                        | 8.311     |
| [Ru(tppz) <sub>2</sub> ][Er(hfac) <sub>4</sub> ] <sub>2</sub> ( <b>3</b> )                    | Er1···Ru1                        | 8.290     |

5. **Table S5** Figures of merits for different geometries of the coordination sphere of Nd(III) centre assuming for **1** calculated with SHAPE software.

| Lable          | Symmetry   | Shape                                     | Calculated results |
|----------------|------------|-------------------------------------------|--------------------|
|                |            |                                           | <b>1-Nd</b>        |
| EP-9           | D9h        | Enneagon                                  | 37.678             |
| OPY-9          | C8v        | Octagonal pyramid                         | 21.406             |
| HBPY-9         | D7h        | Heptagonal bipyramid                      | 18.974             |
| JTC-9          | C3v        | Johnson triangular cupola J3              | 16.949             |
| JCCU-9         | C4v        | Capped cube J8                            | 9.843              |
| CCU-9          | C4v        | Spherical-relaxed capped cube             | 8.631              |
| JCSAPR-9       | C4v        | Capped square antiprism J10               | 1.909              |
| CSAPR-9        | C4v        | Spherical capped square antiprism         | 0.813              |
| JTCTPR-9       | D3h        | Tricapped trigonal prism J51              | 2.420              |
| <b>TCTPR-9</b> | <b>D3h</b> | <b>Spherical tricapped trigonal prism</b> | <b>0.447</b>       |
| JTDIC-9        | C3v        | Tridiminished icosahedron J63             | 12.267             |

6. **Table S6** Figures of merits for different geometries of the coordination spheres of Yb(III) and Er(III) centres assuming for **2** and **3** calculated with SHAPE software.

| Lable        | Symmetry   | Shape                                      | Calculated results |              |
|--------------|------------|--------------------------------------------|--------------------|--------------|
|              |            |                                            | 2-Yb               | 3-Er         |
| OP-8         | D8h        | Octagon                                    | 29.396             | 29.436       |
| HPY-9        | C7v        | Heptagonal pyramid                         | 23.702             | 23.541       |
| HBPY-8       | D6h        | Hexagonal bipyramid                        | 16.119             | 15.662       |
| CU-8         | Oh         | Cube                                       | 9.145              | 15.662       |
| SAPR-8       | D4d        | Square antiprism                           | 1.189              | 1.253        |
| <b>TDD-8</b> | <b>D2d</b> | <b>Triangular dodecahedron</b>             | <b>0.571</b>       | <b>0.547</b> |
| JGBF-8       | D2d        | Johnson gyrobifastigium J26                | 14.470             | 14.801       |
| JETBPY-8     | D3h        | Johnson elongated triangular bipyramid J14 | 28.669             | 28.567       |
| JBTPR-8      | C2v        | Biaugmented trigonal prism J50             | 2.370              | 2.444        |
| BTPR-8       | C2v        | Biaugmented trigonal prism                 | 1.869              | 1.963        |
| JSD-8        | D2d        | Snub diphonoid J84                         | 2.865              | 2.934        |

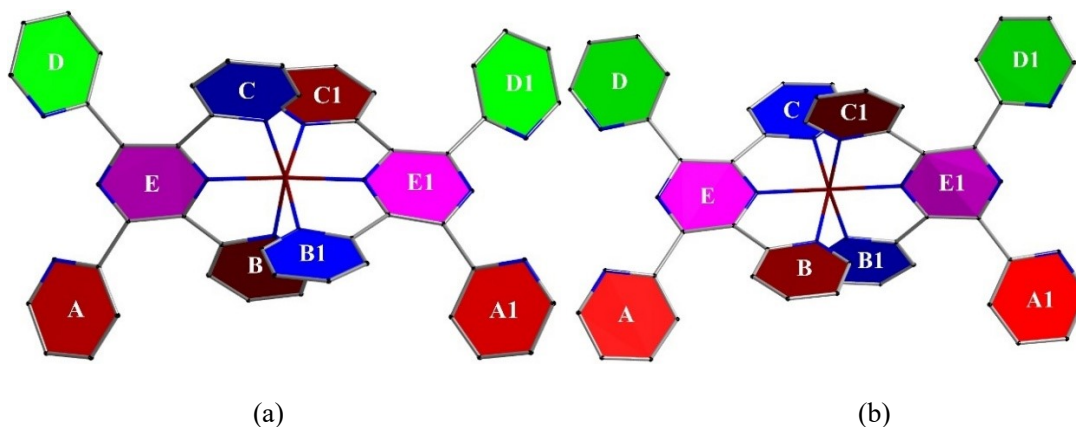

7. **Fig 1S** Perspective views of the  $[\text{Ru}(\text{tppz})_2]^{2+}$  cations in (a) **1-Nd** and (b) **2-Yb** with the pyrazine and pyridyl rings numbering.

8. **Table S7** The dihedral angles of the pyridyl rings (A–D) with respect to the pyrazine ring (E) in the  $[\text{Ru}(\text{tppz})_2]^{2+}$  cation of complex **1**.

| Rings | Angle (°) | Rings | Angle (°) |
|-------|-----------|-------|-----------|
| A-E   | 44.97     | B-E   | 18.12     |
| A-B   | 56.04     | C-D   | 56.73     |
| A-C   | 53.48     | C-E   | 11.69     |
| A-D   | 59.53     | D-E   | 47.39     |
| B-C   | 7.08      | E-E1  | 82.74     |
| B-D   | 63.80     |       |           |

9. **Table S8** The dihedral angles of the pyridyl rings (A–D) with respect to the pyrazine ring (E) in the  $[\text{Ru}(\text{tppz})_2]^{2+}$  cation of complex **2**.

| Rings | Angle (°) | Rings | Angle (°) |
|-------|-----------|-------|-----------|
| A-E   | 38.14     | B-E   | 21.56     |
| A-B   | 57.71     | C-D   | 57.71     |
| A-C   | 57.95     | C-E   | 21.56     |
| A-D   | 34.53     | D-E   | 28.14     |
| B-C   | 7.10      | E-E1  | 38.82     |
| B-D   | 57.95     |       |           |

10. **Table S9**  $\pi$ - $\pi$  stacking interactions are observed between the aromatic rings in complex **1**.

| Rings  | Centroid distance (Å) | Vertical distance (Å) | Offset angle (°) |
|--------|-----------------------|-----------------------|------------------|
| A•••A1 | 4.214(4)              | 3.651(8)              | 19.9(4)          |
| B•••B1 | 3.611(4)              | 3.456(5)              | 0.0(8)           |
| D•••D1 | 4.673(6)              | 3.351(12)             | 0.0(13)          |

11. **Table S10**  $\pi$ - $\pi$  stacking interactions are observed between the aromatic rings in complex **2**.

| Rings   | Centroid distance (Å) | Vertical distance (Å) | Offset angle (°) |
|---------|-----------------------|-----------------------|------------------|
| C•••C   | 3.621(3)              | 3.569(2)              | 0.0(6)           |
| C1•••C1 | 3.621(3)              | 3.515(2)              | 0.0(6)           |
| D•••D1  | 3.889(4)              | 3.410(3)              | 18.5(3)          |

|        |          |          |         |
|--------|----------|----------|---------|
| A•••A1 | 4.069(4) | 3.839(4) | 20.5(4) |
|--------|----------|----------|---------|

12. Table S11 IR data for [Ru(tppz)<sub>2</sub>](PF<sub>6</sub>) and complexes 1-3.

| Compounds                                               | $\nu$ (C-H)<br>cm <sup>-1</sup> | $\nu$ (C=O)<br>cm <sup>-1</sup> | $\nu$ (C=C)<br>$\nu$ (C=N) cm <sup>-1</sup> | $\nu$ (C-F)<br>cm <sup>-1</sup> | $\delta$ (C-H)<br>cm <sup>-1</sup> |
|---------------------------------------------------------|---------------------------------|---------------------------------|---------------------------------------------|---------------------------------|------------------------------------|
| [Ru(tppz) <sub>2</sub> ](PF <sub>6</sub> ) <sub>2</sub> | 3048                            | /                               | 1587,1527                                   | /                               | 839,787,753,657                    |
| 1-Nd                                                    | 2926                            | 1653                            | 1532                                        | 1256,1198,1140                  | 796,659                            |
| 2-Yb                                                    | 2924                            | 1654                            | 1531                                        | 1257,1205,1141                  | 793,663                            |
| 3-Er                                                    | 2925                            | 1653                            | 1530                                        | 1263,1205,1146                  | 796,659                            |

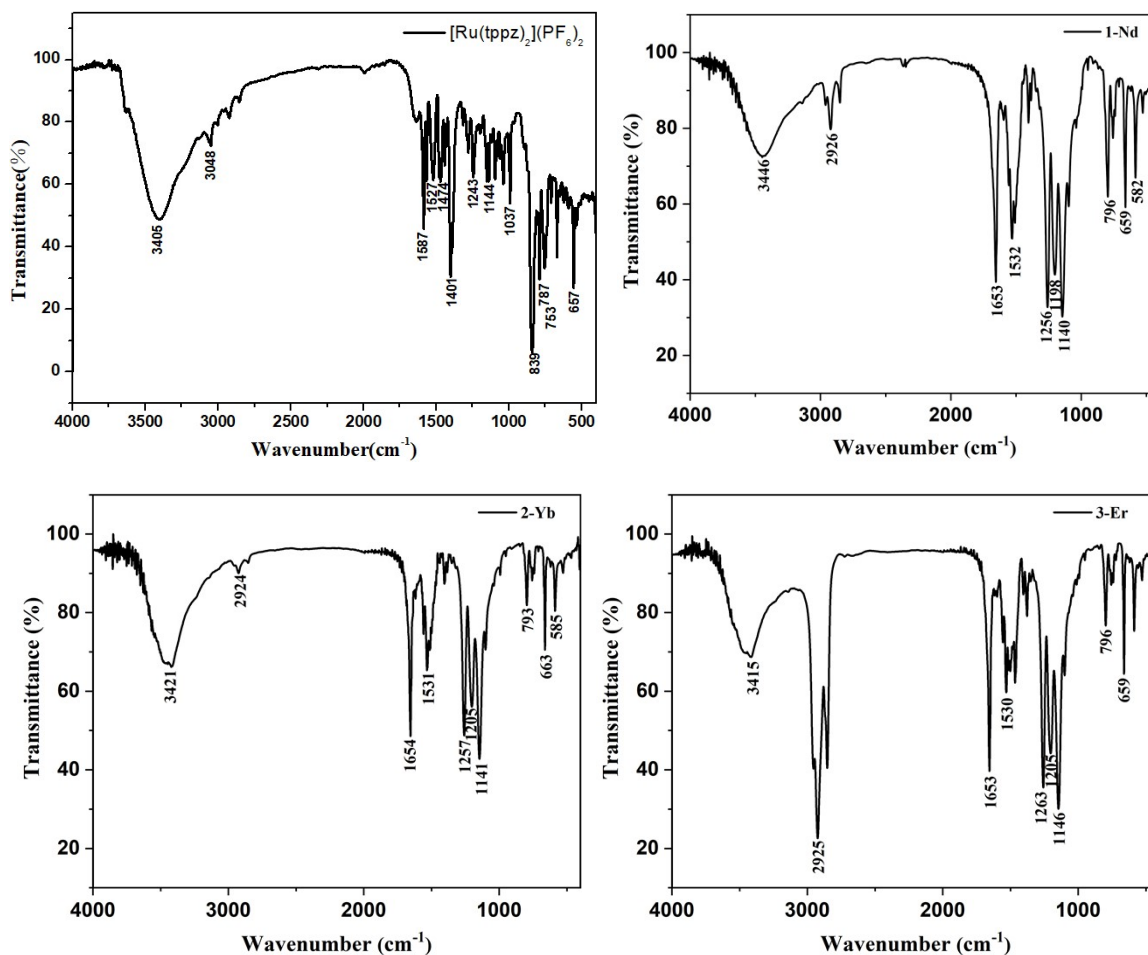

13. Fig 2S IR spectra of [Ru(tppz)<sub>2</sub>](PF<sub>6</sub>) and complexes 1-3.

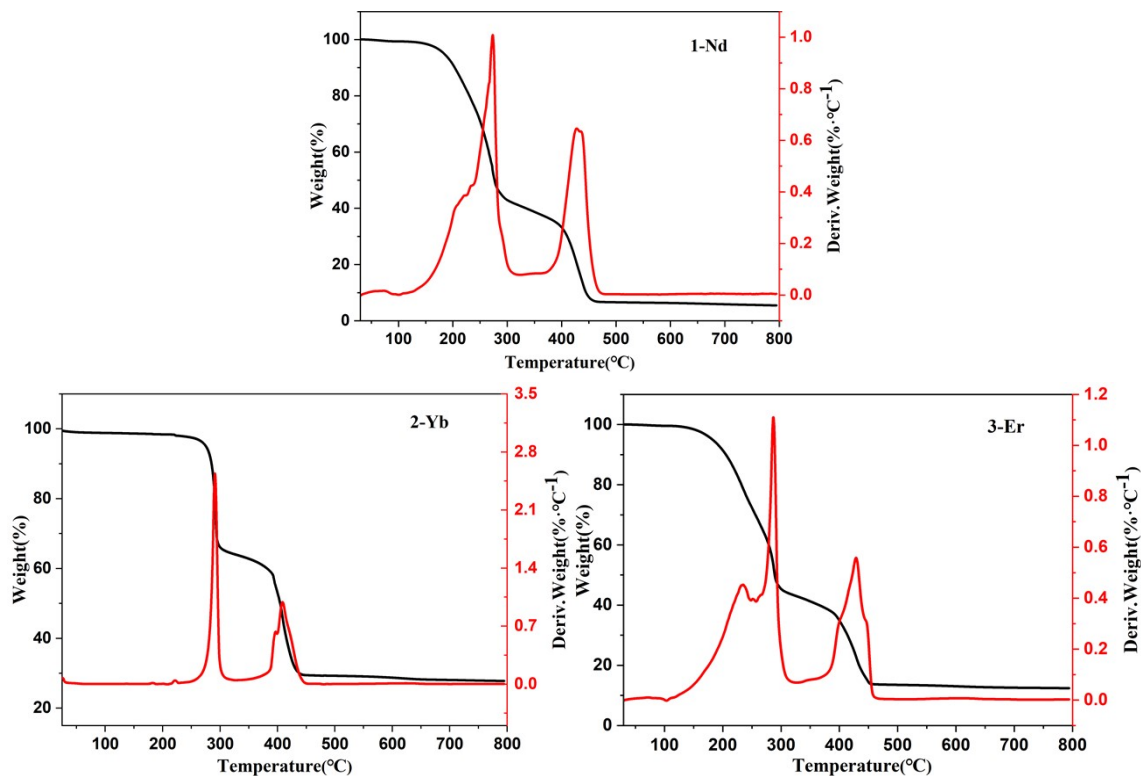

14. **Fig S3** TGA (black) and DTG (red) curves for complexes **1-3**.

15. **Table S12** Relative contributions of various intermolecular interactions to the Hirshfeld surfaces for complexes **1-3**.

| Complex (%) | H-F/<br>F-H | F-F         | H-H         | C-F/<br>F-C | H-O/<br>O-H | H-C/<br>C-H | H-N/<br>N-H | C-C | O-F/<br>F-O | C-N/<br>N-C | N-F/<br>F-N | C-O/<br>O-C |
|-------------|-------------|-------------|-------------|-------------|-------------|-------------|-------------|-----|-------------|-------------|-------------|-------------|
| <b>1-Nd</b> | <b>41.7</b> | <b>24.7</b> | <b>12.6</b> | 6.6         | 6.4         | 4.6         | 1.3         | 0.9 | 0.6         | 0.3         | 0.2         | -           |
| <b>2-Yb</b> | <b>37.9</b> | <b>28.8</b> | <b>13.0</b> | 5.6         | 3.9         | 4.2         | 2.2         | 1.8 | 1.2         | 0.7         | 0.3         | 0.4         |
| <b>3-Er</b> | <b>38.1</b> | <b>28.7</b> | <b>9.4</b>  | 6.1         | 3.9         | 5.6         | 4.1         | 1.8 | 1.2         | 0.8         | -           | 0.4         |

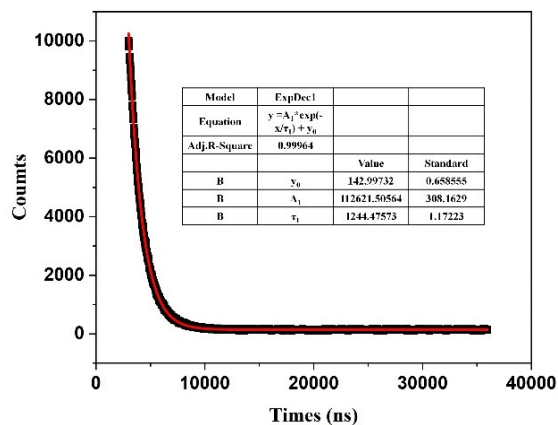

16. **Fig S4** Solid-state  ${}^4F_{3/2} \rightarrow {}^4I_{11/2}$  decay profile for **1-Nd** at 1062 nm.
